# Supplementary material
Source: publisher figshare collection journal article supplement (https://acs.figshare.com/ndownloader/files/3776170)
Supplement: Supplementary file 1 [file 3776170]

**Chain Stiffness-Induced Entropy Effects Mediate Interfacial  
Assembly of Janus Nanoparticles in Block Copolymers: from  
Interfacial Nanostructures to Optical Responses**

Bojun Dong, Zihan Huang, Honglin Chen, and Li-Tang Yan\*

*Key Laboratory of Advanced Materials (MOE), Department of Chemical Engineering,  
Tsinghua University, Beijing 100084, P. R. China*

The files include:

**SI-1:** Relation between persistence length and  $K_a$  (Page 2)

**SI-2:** Detailed discretization forms of Eqs.3 and 4 in the main text. (Pages 3, 4)

**SI-3:** Additional simulation results (Pages 5-11)

**Figures S1-S9**

### SI-1. Relation between persistence length and $K_a$

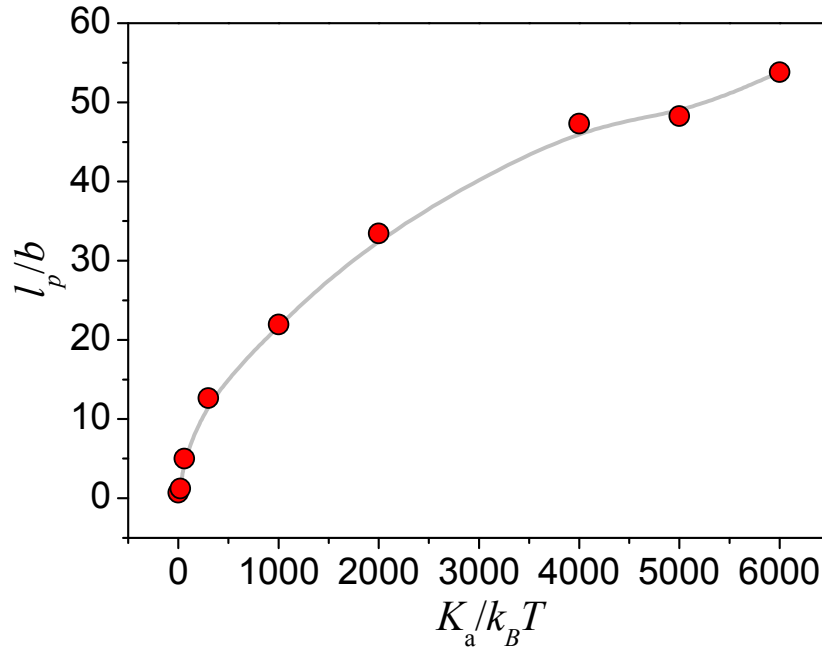

**Figure S1.** Persistence length of the polymer chain,  $l_p$ , as a function of  $K_a$ . Here  $b=0.5r_c$  is the equilibrium bond length. The line is to guide the eye. Here  $l_p$  is calculated through systematical DPD simulations of a single polymer chain.<sup>1</sup> The relationship between  $K_a$  and  $l_p$  indicates a detailed correlation between our simulations results and the possible experimental systems.

**Ref.1:** Micka, U.; Kremer, K. *J. Phys.: Condens. Matter* **1996**, 8, 9463-9470.

**SI-2. The detailed discretization forms of Eqs.3 and 4 in the main text.**

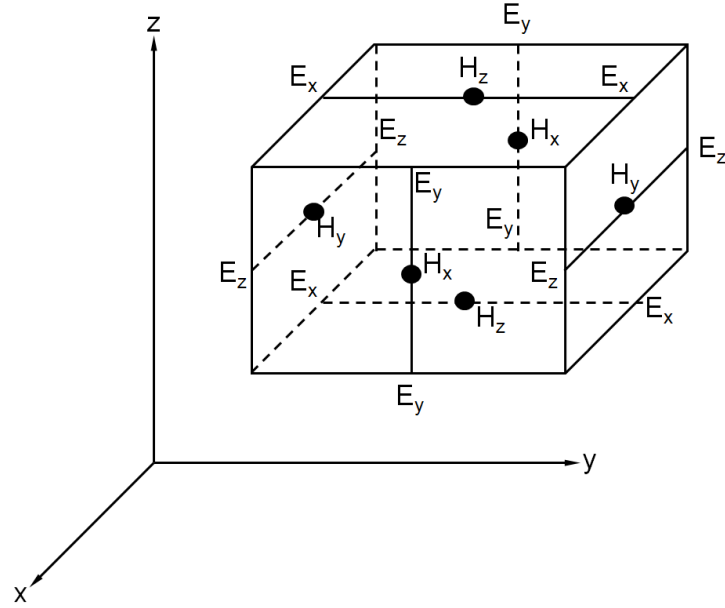

**Figure S2.** Positions of the field components within in Yee cell.

Following Yee's notation,<sup>2</sup> we assume that the grid point of the space is defined as  $(i, j, k)$  with coordinates  $(i\delta_x, j\delta_y, k\delta_z)$ , where  $\delta = \delta_x = \delta_y = \delta_z$ , is the cubic cell size, and  $\delta_t$  is the time increment. Making the substitution

$$\tilde{E} = \left( \frac{\epsilon_0}{\mu_0} \right)^{1/2} E \quad (\text{S1})$$

A set of finite-difference equations is obtained as follows:

$$\begin{aligned} & \tilde{E}_x^{n+1}(i+1/2, j, k) \\ &= CA_x(i+1/2, j, k) \tilde{E}_x^n(i+1/2, j, k) \\ &+ CB_x(i+1/2, j, k) [H_z^{n+1/2}(i+1/2, j+1/2, k) \\ &- H_z^{n+1/2}(i+1/2, j-1/2, k) \\ &+ H_y^{n+1/2}(i+1/2, j, k-1/2) \\ &- H_y^{n+1/2}(i+1/2, j, k+1/2)] \end{aligned} \quad (\text{S2})$$

$$\begin{aligned}
& H_x^{n+1/2}(i, j+1/2, k+1/2) \\
& = H_x^{n-1/2}(i, j+1/2, k+1/2) \\
& + RC[\tilde{E}_y(i, j+1/2, k+1) \\
& - \tilde{E}_y^n(i, j+1/2, k) \\
& + \tilde{E}_z^n(i, j, k+1/2) \\
& - \tilde{E}_z^n(i, j+1, k+1/2)]
\end{aligned} \tag{S3}$$

$$CA_x(i+1/2, j, k) = \frac{2\varepsilon_x(i+1/2, j, k) - \sigma_x(i+1/2, j, k)\delta_t}{2\varepsilon_x(i+1/2, j, k) + \sigma_x(i+1/2, j, k)\delta_t} \tag{S4}$$

$$CB_x(i, j, k+1/2) = \frac{2\varepsilon_0 RC}{2\varepsilon_z(i, j, k+1/2) + \sigma_z(i, j, k+1/2)\delta_t} \tag{S5}$$

$$RC = \frac{\delta_t}{\delta(\mu_0\varepsilon_0)^{1/2}} = 0.5 \tag{S6}$$

**Ref.2:** Yee, S. K. *IEEE Trans. Antennas Prop.* **1966**, *AP-14*, 302-307.

### SI-3. Additional simulation results

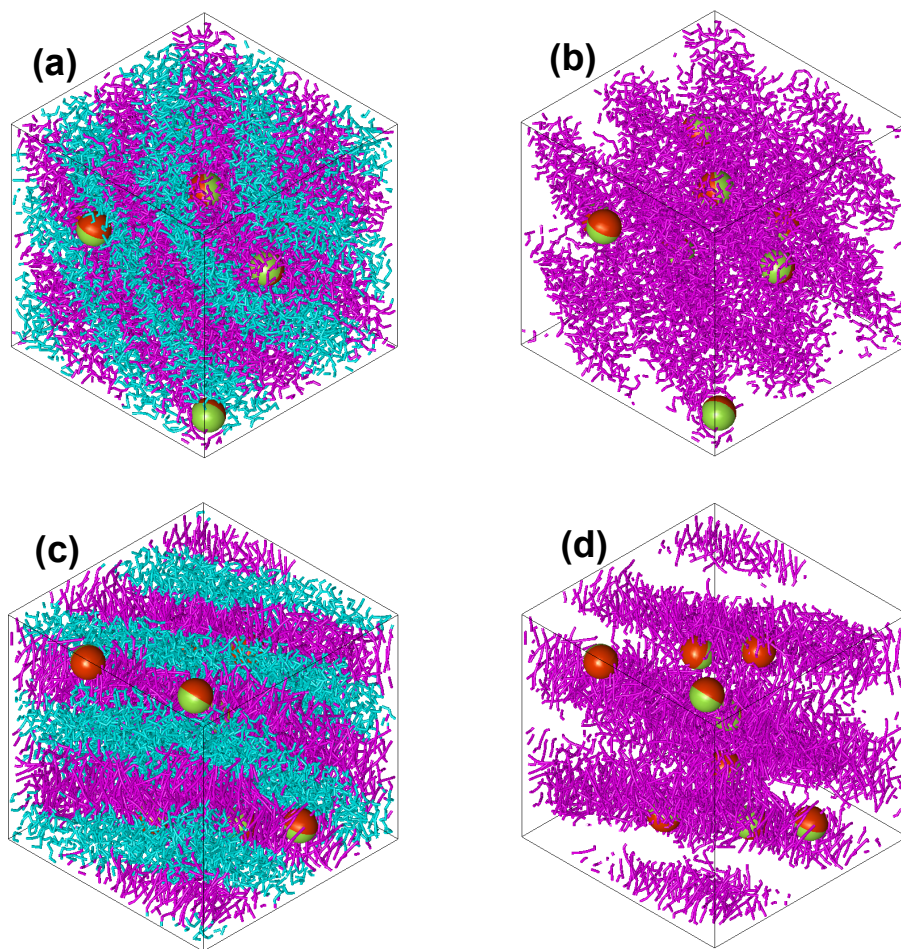

**Figure S3.** Comparison between the self-assembled structures of Janus nanoparticles in AB diblock copolymers with flexible (a, b) and rodlike (c, d) block B, where (a, b)  $K_a=0k_BT$ , and (c, d)  $K_a=1000k_BT$ . In (b) and (d), the segment of flexible block A is removed for clarity.

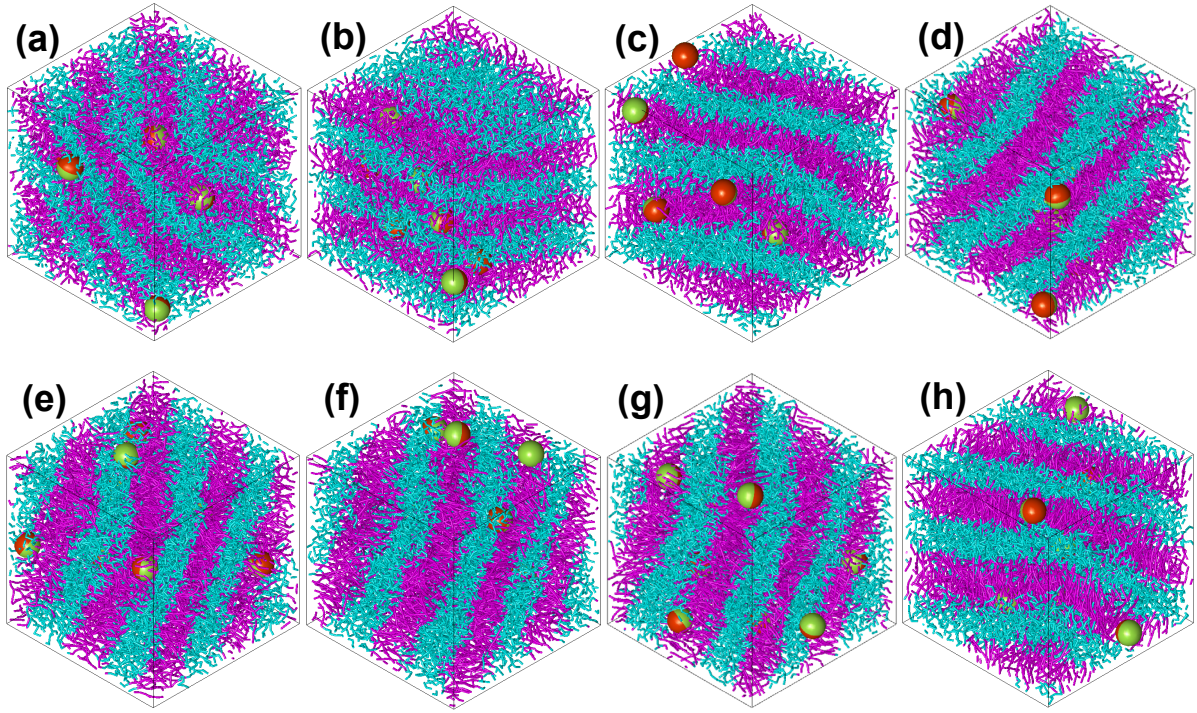

**Figure S4.** Self-assembly of Janus nanoparticles in AB diblock copolymers with flexible A block but stiff B block of a series of stiffness: (a)  $K_a=0k_BT$ , (b)  $K_a=20 k_BT$ , (c)  $K_a=40k_BT$ , (d)  $K_a=80k_BT$ , (e)  $K_a=100k_BT$ , (f)  $K_a=300 k_BT$ , (g)  $K_a=700k_BT$ , and (h)  $K_a=900k_BT$ .

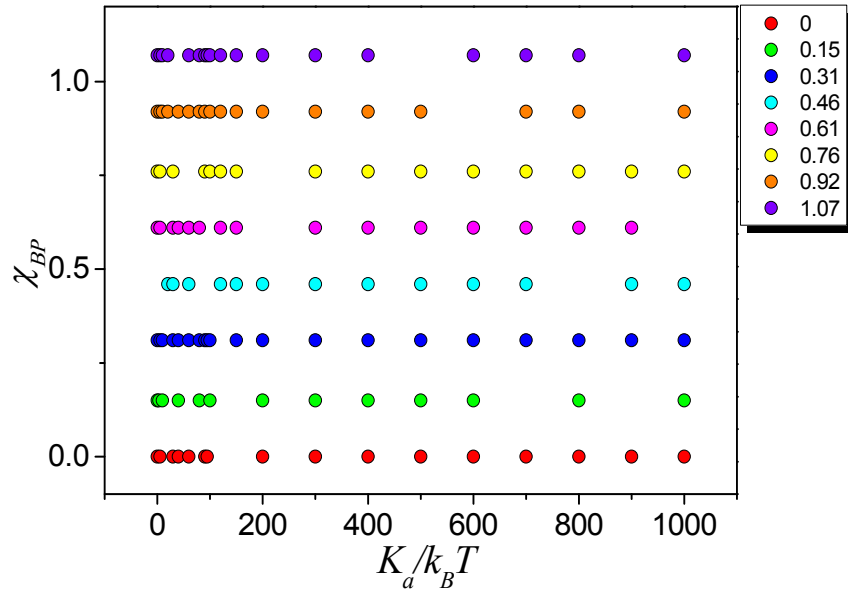

**Figure S5.** Points where independent runs were performed to generate the contour map of Figure 3.

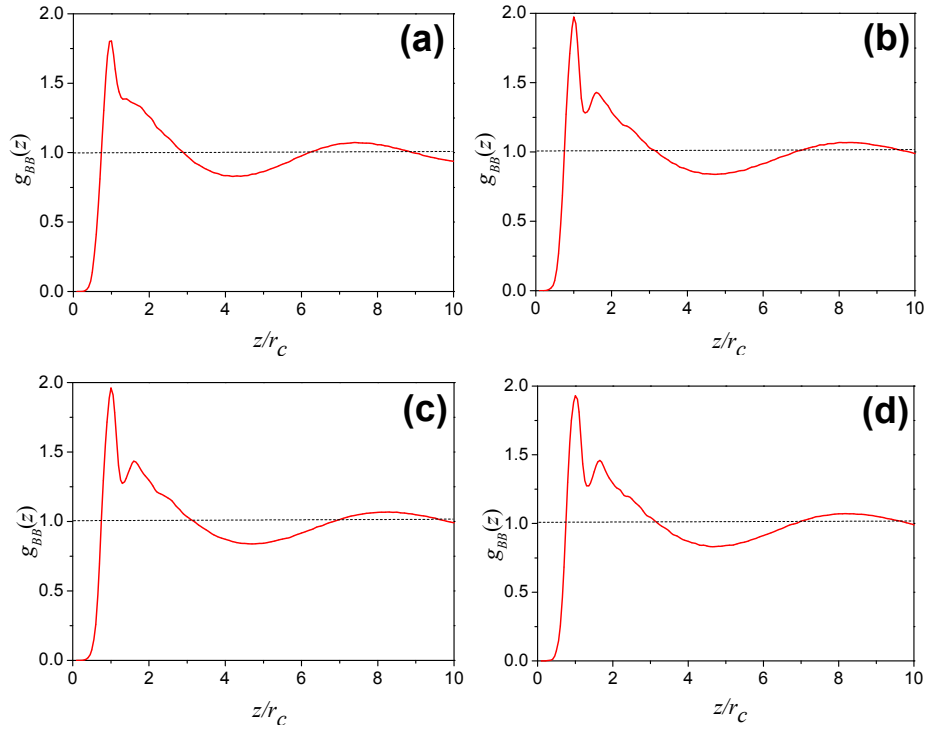

**Figure S6.** Pair correlation function between B-block beads for various stiffness of block B,

$g_{BB}(z)$ : (a)  $K_a=0k_B T$ , (b)  $K_a=60 k_B T$ , (c)  $K_a=100k_B T$ , and (d)  $K_a=400k_B T$



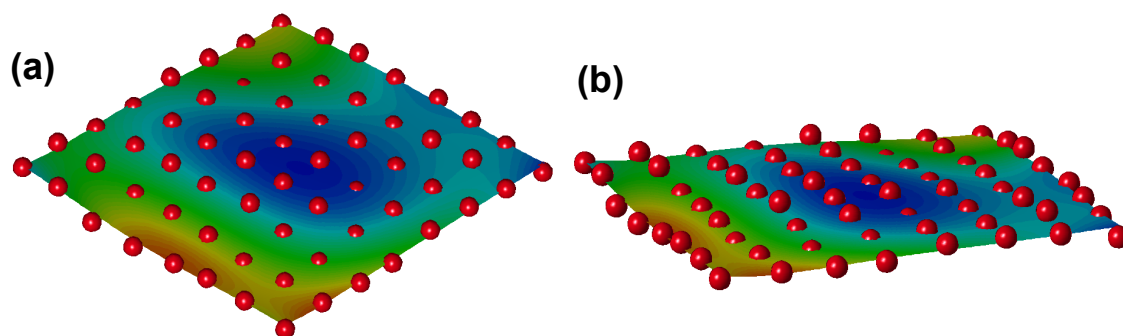

**Figure S7.** The position correlation between the interfacial DPD beads and the best-fitted surface of the phase interface from different views.

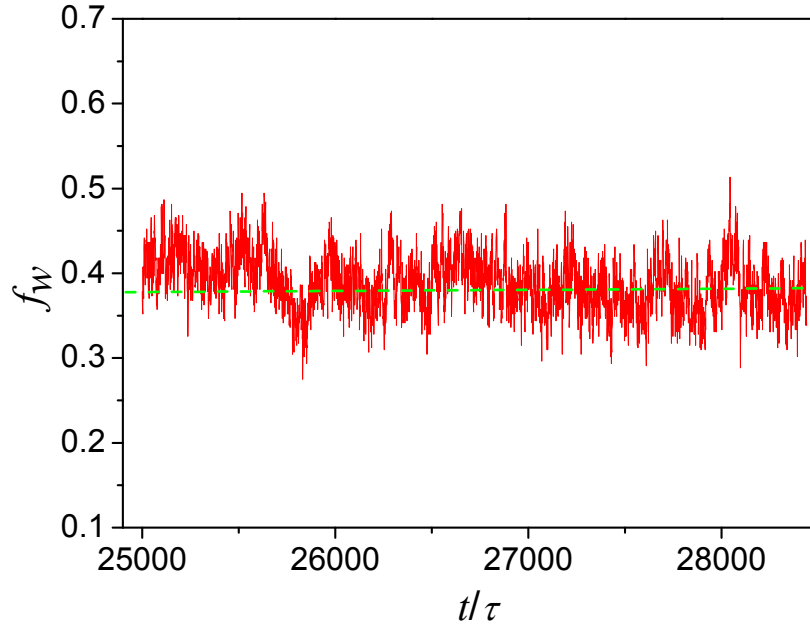

**Figure S8.** Temporal evolution of wrapping degree,  $f_w$ , after the formation of lamella structure for the stiff B block with  $K_a=100k_BT$ .

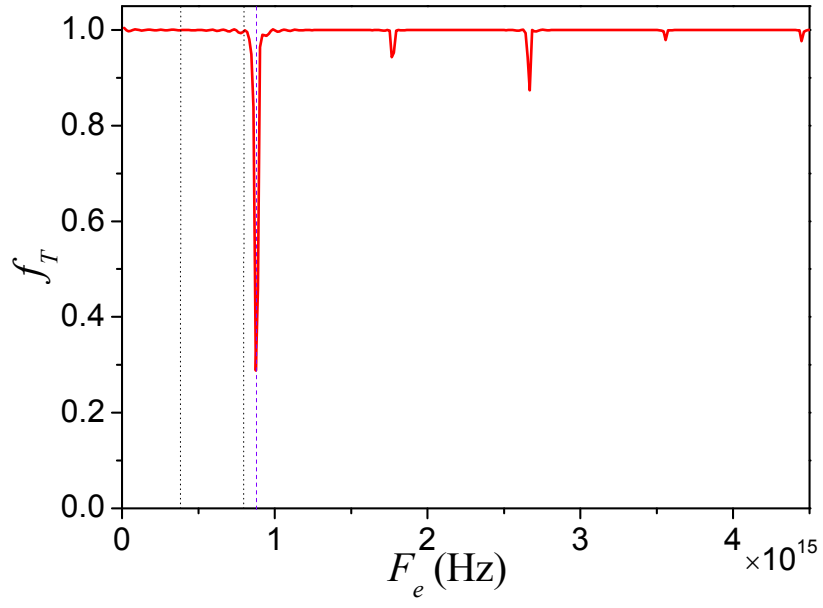

**Figure S9.** Transmittance spectra from the FDTD simulation of symmetry diblock copolymers. The dotted vertical lines mark the frequency range of visible spectrum. The violet dashed line denotes the principal frequency of the transmittance spectra.
